# Supplementary material for: Composite Coatings of Chitosan and Silver Nanoparticles Obtained by Galvanic Deposition for Orthopedic Implants
Source: MDPI journal article supplement (doi:10.3390/polym14183915), 2022-09-19
Supplement: s1 [file s1]

# Composite Coatings of Chitosan and Silver Nanoparticles Obtained by Galvanic Deposition for Orthopedic Implants

C. Zanca <sup>1</sup>, S. Carbone <sup>1</sup>, B. Patella <sup>1</sup>, F. Lopresti <sup>1</sup>, G. Aiello <sup>1</sup>, V. Brucato <sup>1</sup>, F. Carfi Pavia <sup>1,2</sup>, V. La Carrubba <sup>1,3</sup> and R. Inguanta <sup>1,\*</sup>

<sup>1</sup> Department of Engineering, University of Palermo, RU INSTM, Viale delle Scienze, 90133 Palermo, Italy

<sup>2</sup> Consorzio Universitario di Caltanissetta, Corso Vittorio Emanuele 92, 93100 Caltanissetta, Italy

<sup>3</sup> ATeN Center, University of Palermo, Viale delle Scienze, 90133 Palermo, Italy

\* Correspondence: rosalinda.inguanta@unipa.it

## Supplementary

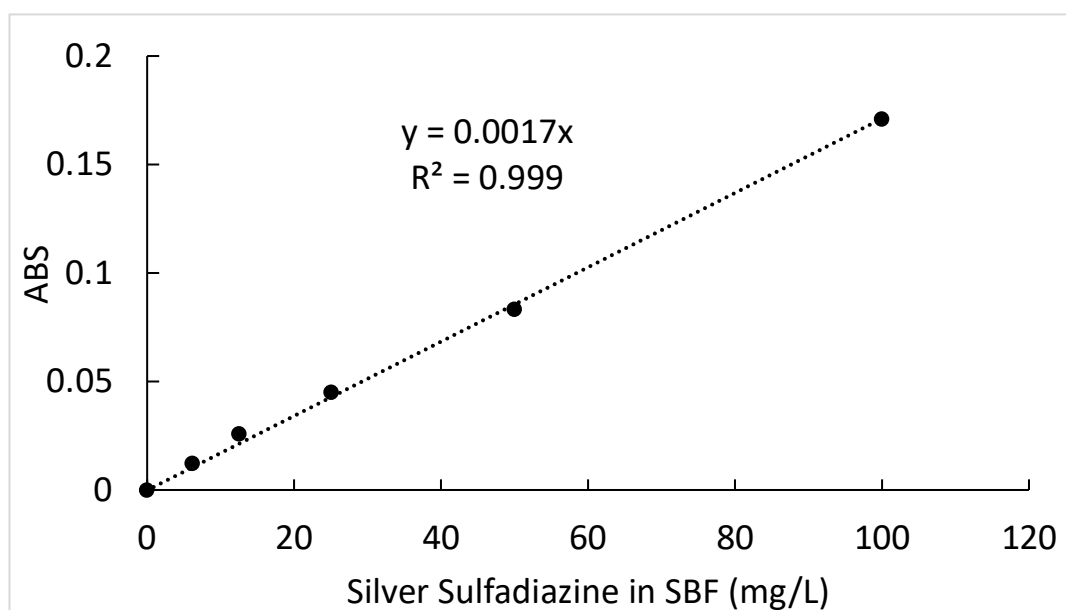

**Figure S1.** Calibration line of Silver Sulfadiazine in SBF obtained via UV-Vis absorbance spectra at 262 nm

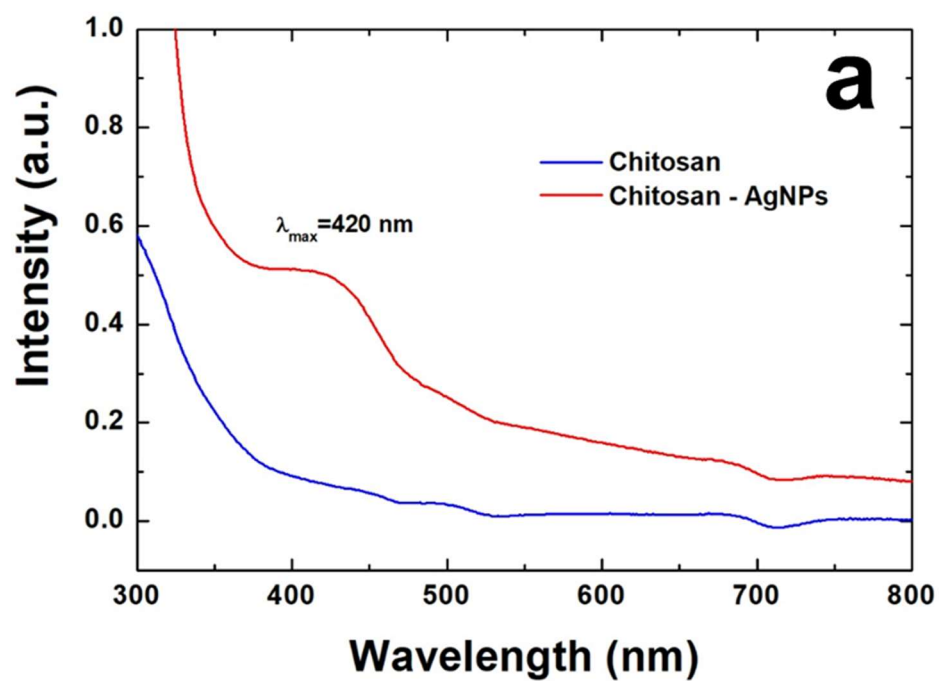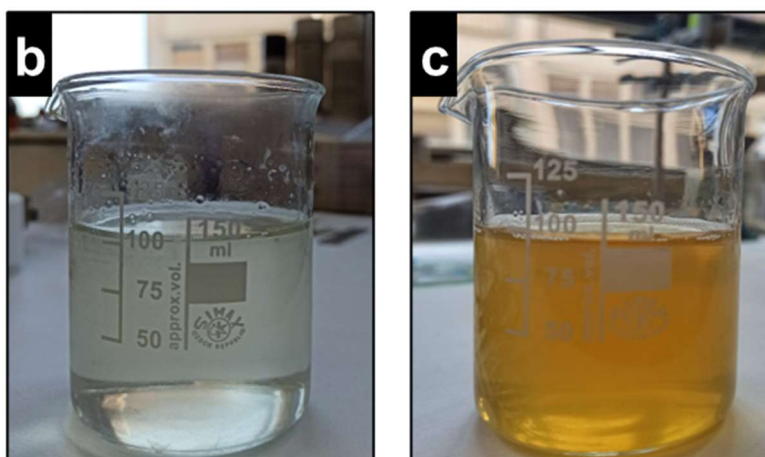

**Figure S2.** (a) UV-VIS spectra of cathodic solution. (b) Solution with CS and (c) CS/AgNPs

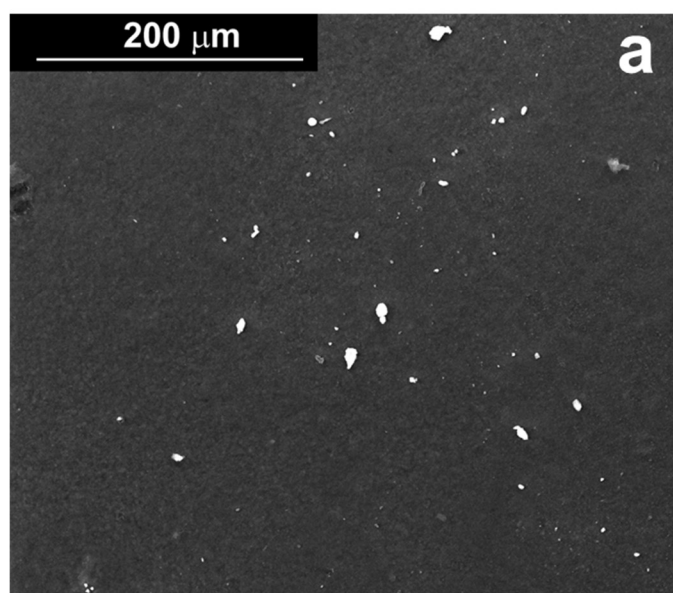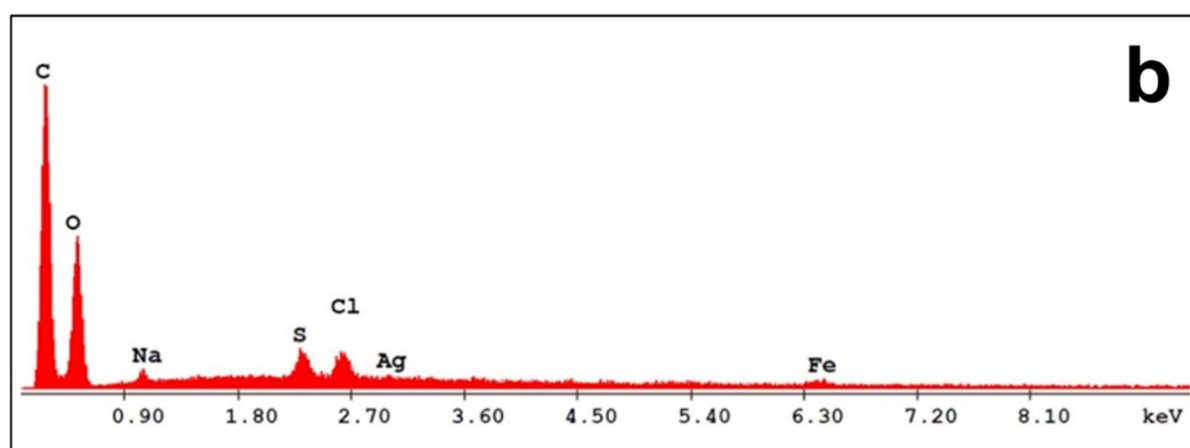

**Figure S3** (a) SEM image of coating and (b) relative EDS spectrum of the coating obtained using a solution of  $10\text{gL}^{-1}$  of CS after immersion in SBF for 21 days.

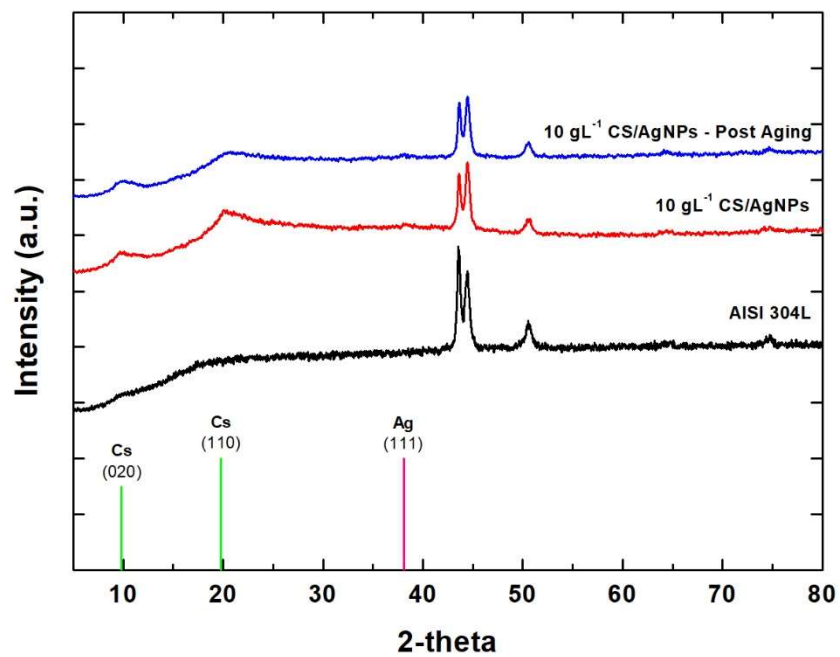

**Figure S4.** XRD patterns of the sample 10 gL<sup>-1</sup> CS/AgNPs after aging in SBF.

|                              | $\Delta H$ [J/g] |
|------------------------------|------------------|
| Chitosan powder LMW          | 252              |
| 10 gL <sup>-1</sup> CS       | 213              |
| 10 gL <sup>-1</sup> CS/AgNPs | 237              |

**Table S1.** Melting enthalpy calculate by DSC

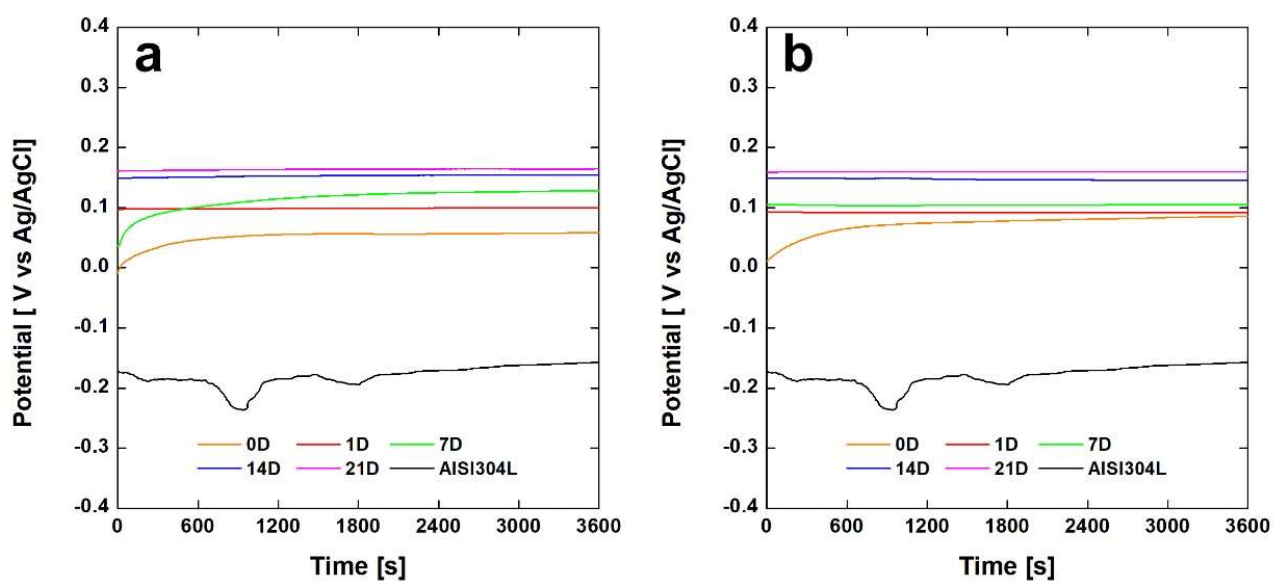

**Figure S5** OCP curves after different aging time: a) coating obtained using a solution of 7.5 gL<sup>-1</sup> of CS, b) coating obtained using a solution of 10gL<sup>-1</sup> of CS.

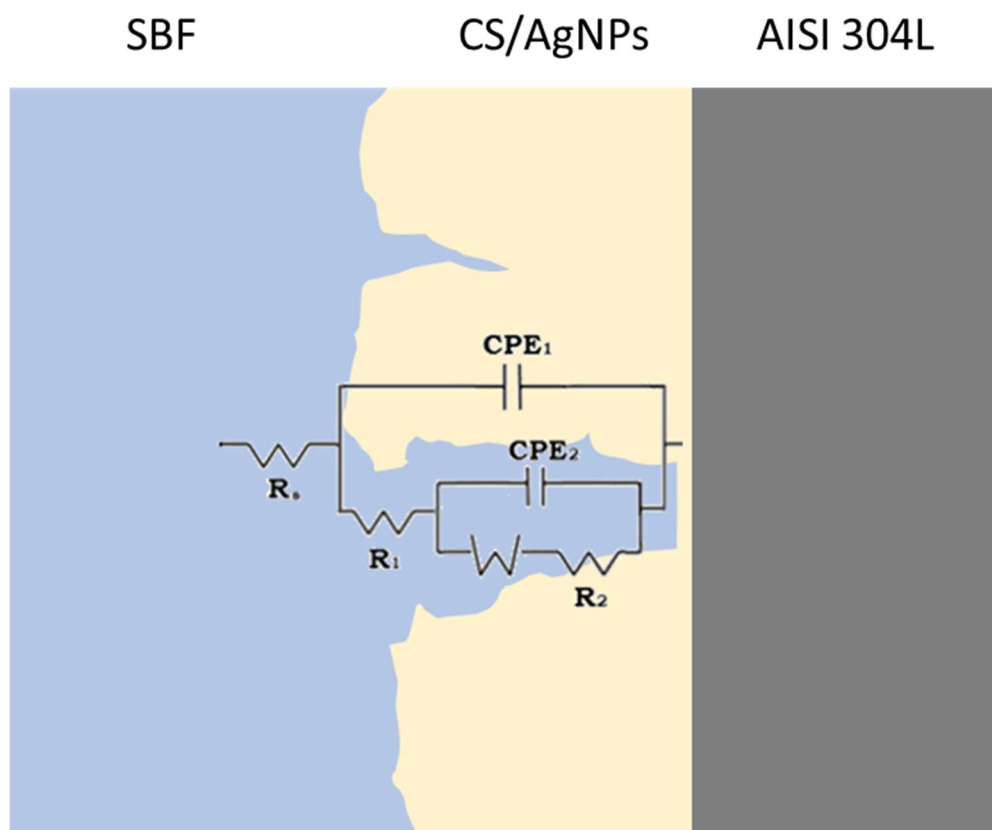

**Figure S6** Schematic cross-section of the coating and equivalent circuit used to fitting the impedance data

|             | Time (Day)           |                    |                    |                    |                    | AISI 304L          |
|-------------|----------------------|--------------------|--------------------|--------------------|--------------------|--------------------|
|             | 0                    | 1                  | 7                  | 14                 | 21                 |                    |
|             | R(CPE1(R(CPE2(RW)))) |                    |                    |                    |                    | R(CPE R)           |
| $R_s$       | 77.81                | 82.89              | 79.26              | 75.49              | 73.42              | 32.62              |
| $CPE_1-Y$   | $4.59 \times 10^5$   | $3.09 \times 10^5$ | $5.04 \times 10^5$ | $6.19 \times 10^5$ | $6.16 \times 10^5$ | -                  |
| $CPE_1-n_1$ | 0.6489               | 0.653              | 0.5419             | 0.5076             | 0.5218             | -                  |
| $R_1$       | 237.4                | 564.2              | 1053               | 1728               | 1612               | -                  |
| $CPE_2-Y$   | $4.77 \times 10^5$   | $4.06 \times 10^5$ | $3.23 \times 10^5$ | $3.3 \times 10^5$  | $3.41 \times 10^5$ | $5.51 \times 10^5$ |
| $CPE_2-n_2$ | 0.7602               | 0.7297             | 0.7465             | 0.7953             | 0.8123             | 0.7665             |
| $R_2$       | $1.14 \times 10^5$   | $4.97 \times 10^5$ | $4.48 \times 10^4$ | $1.55 \times 10^6$ | $9.21 \times 10^5$ | $5.38 \times 10^5$ |
| W           | $4.36 \times 10^5$   | $2.61 \times 10^5$ | $4.11 \times 10^6$ | $2.85 \times 10^5$ | $1.98 \times 10^5$ | -                  |

**Table S2** Fitting parameters of impedance data of the sample 10 gL<sup>-1</sup> CS/AgNPs. For comparison, the value of uncoated AISI 304L fitted with an R(CPE(R)) equivalent circuit was also reported. The mean standard deviation was 3.7%
